# Supplementary material for: HJURP is involved in the expansion of centromeric chromatin
Source: PubMed Central journal article supplement — Mol Biol Cell. 2015 Aug 1;26(15):2742–54. doi: 10.1091/mbc.E15-02-0094 (PMC4571335; doi:10.1091/mbc.e15-02-0094), 2015-08-01

# Supplemental Materials

*Molecular Biology of the Cell*

Perpelescu et al.

## Supplementary Figure legend

### Figure S1, related to Figure 1. Localization profile of chicken HJURP and FACS analysis of conditional HJURP knockout cells at the indicated time after tetracycline addition.

- (A) Localization of GFP-HJURP (full length) throughout the cell-cycle. CENP-T was used as a centromere marker.
- (B) DNA was stained with propidium iodide (x axis) and the replication stage was recognized by BrdU incorporation followed by staining with FITC-anti BrdU (y axis). cell stages and the percentage represent the gated events were written.

### Figure S2, related to Figure 3. Rescue assay with different HJURP mutant proteins

- (A) Schematic of chicken (*Gallus gallus*) HJURP in comparison with the human homologue (upper).
- (B) Sequence alignment of chicken (ggHJURP) human HJURP (hsHJURP). Alignment was generated with ClustalW2 program.
- (C) Cell proliferation assay for HJURP-conditional knockout cell line alone or stably expressing GFP-HJURP full length or functional mutant proteins.
- (D) Same as in (C) for HJURP mutant proteins that cannot rescue HJURP-deficiency.

### Figure S3, related to Figure 4. HJURP centromere recruitment is mediated by Mis18 complex components.

- (A) Mass-spectrometry results for IP with anti-FLAG in cells expressing Mis18 $\alpha$  and IP with anti-GFP in cells expressing CENP-C<sup>644-864</sup>. For IP with cells expressing GFP-CENP-C<sup>644-864</sup>, we used nuclear soluble fraction.
- (B) Immunoprecipitation (IP) experiments were performed with anti-Mis18 $\alpha$  and anti-GFP in cells expressing GFP fused HJURP mutant proteins. Mis18 $\alpha$  IP detected M18BP1/KNL2 but not HJURP. Full-length HJURP was co-precipitated with M18BP1/KNL2. Whole cell lysate was used for IP.
- (C) Immunoblot showing the different cellular localization of M18BP/KNL2, HJURP, CENP-C, Mis18 $\alpha$  and CENP-A. Loading control are actin and

post-blotting CBB (Coomassie Brilliant Blue) staining of the same gel.

- (D) Western blot analysis showing the levels of GFP-HJURP<sup>FL</sup> stable expressed in Mis18 $\alpha$ , CENP-C and M18BP1/KNL2 conditional knockout cell lines before and after 48hrs tetracycline supplementation of the culture media. Also, the efficient knockout of HJURP, Mis18 $\alpha$  and M18BP1/KNL2 is shown.
- (E) Western blot analysis showing the levels of GFP-HJURP<sup>401-end</sup> stable expressed in Mis18 $\alpha$ , CENP-C and M18BP1/KNL2 conditional knockout cell lines before and after 48hrs tetracycline supplementation. The efficiency of depletion for HJURP, Mis18 $\alpha$  and M18BP1/KNL2 is shown.
- (F) Immunofluorescent staining showing the retention of GFP-HJURP<sup>401-end</sup> (green) at centromere marked by CENP-T (red) in the CENP-C-deficient cells before and at 48hours after tetracycline addition. GFP-HJURP<sup>401-end</sup> is stably expressed in CENP-C knockout cell line.
- (G) Similar to D but for Mis18 $\alpha$  conditional cell line stably expressing GFP-HJURP<sup>401-end</sup> showing loss of HJURP<sup>401-end</sup> from centromere after Mis18 $\alpha$  deficiency following 48hrs tetracycline treatment.
- (H) Immunofluorescence image showing that GFP-HJURP<sup>401-end</sup> cannot localize to centromere in the M18BP1/KNL2-deficient cells at 48hrs upon tetracycline addition.

**Figure S4, related to Figure 5. LacI-HJURPs at the LacO site were not visible after IPTG addition.**

- (A) An experimental scheme for Figure 5.
- (B) Although LacI-HJURPs localize at the LacO site was detected in the absence of IPTG (Figure 5B), these signals were not detected in the presence of IPTG. After cells were cultured for 1 week in the presence of IPTG, ChIP-seq analysis with anti-CENP-A was performed. Arrows shows artificial kinetochores.

A

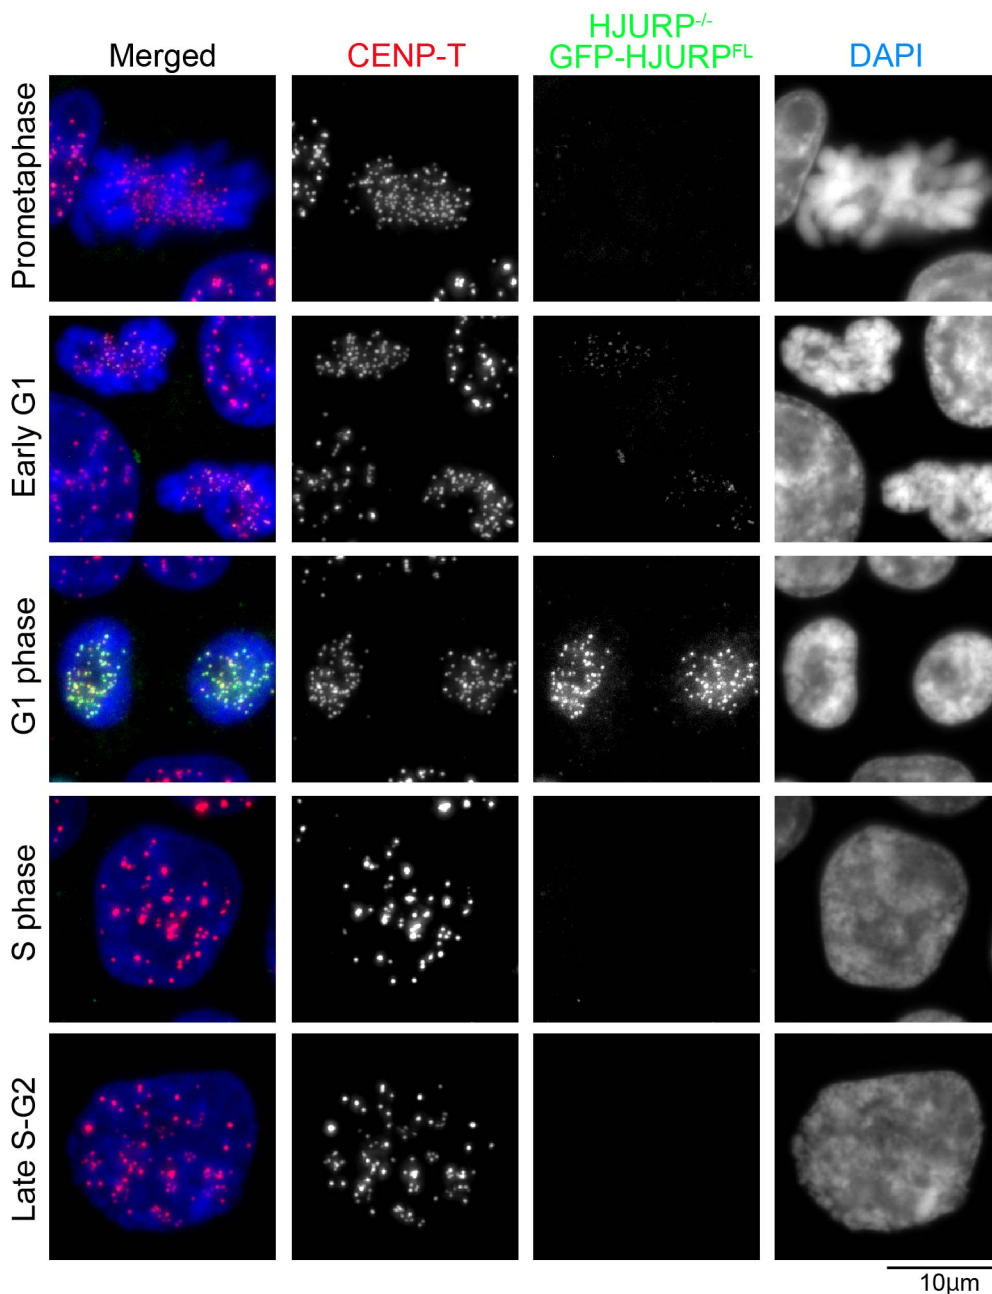

B

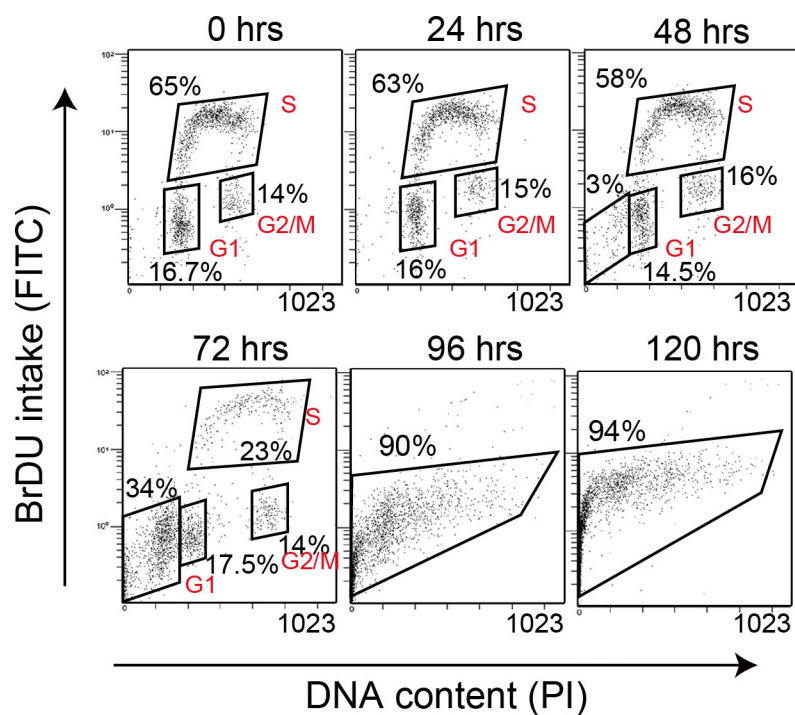

A

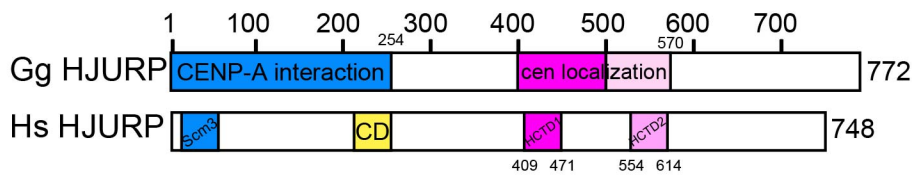

B

```

>ggHJURP  -----MALDLDERLRRSNARFQTSILSILERYNYPFEDDFLISMETLTYDTP  47
>hsHJURP  MLGTLRAMEGEDVEDDQLLQKLRASRRRFQRRMQRLIEKYNGPFEDTPVVGMAATLTYETP  60
          :* : ** * . *** : : * : ** **** : . * **** : **

>ggHJURP  EGPKEWGDLSSTKEVYRKRFKHARSQRTADQTAGESDAEIVSVRRRFEDIHFQNLDDLDDV  107
>hsHJURP  QGLRTIWGGRLIKERNEGETQDS-SMKPADRTDGSVQAAAWGPELPSHRTVLGADSKSGEV  119
          :* : ** . ** : . : : * : ** : * . . * . . . : . : . : *

>ggHJURP  KAREKVQVQVDVIVQDNERRIPKWIITVEPSSSHFTSPVREMIGHQSSVCRKKVELANECS  167
>hsHJURP  DATS-----DQEESVAWALAPAVPQSPKLNELRRIKYLTVQVDILLQGAEYFECAG  168
          . * . . . . * : . . : : . * . . . : * . * : . : * : . .

>ggHJURP  SSGPDQLQSSGVPMLPDTITVPRHRSFQEMNETGYNSTLEEYQSADEGCSSWNVTLADLY  227
>hsHJURP  NRAGRDVRYVTPPLPSLASPAPVAPGYCSRTSRKSPGDPAKPASPPEMDPLHPSSTDMALV  228
          . . . . : * * . . . . : : : : : : : : . . . . . *

>ggHJURP  PKMVEVLTKLITKEARKKTSKYVFLYKYKRGHARRPKLSITVEKIRKFRPLKLLKALPS  287
>hsHJURP  PRNDSLSLQETSSSSFLSSQPFEDDDICNVITISDLYAGMLHMSRLLSTKPSIIISTKTF  288
          * : . : : . : . : . : . . . . . : : : : : . * : . : .

>ggHJURP  ICSGSKDIQNQTFGSNINENSGLLDDPCFIDSSSGLVPFSYSDTNEMEMDCSDSSLDYHL  347
>hsHJURP  IMQNWNSRRRHRYSRMNKTYCKGARRSGRSSKENIFPCSEPVKGTGALRDCKNVLD--V  346
          * . . . : : : * : * . . . . * . . . : * * . . . : . . * :

>ggHJURP  VFGKDQKLSEQIAPNALARMGETFLAEDQLQTTVSLNSSKYNKSGYLTYKHSLEPPFRT  407
>hsHJURP  SCRKTGLKLEKAFLEVNRPQIHKLDPSMKERKVTPSKYSSLIFYDSSATYNLDEENRFT  406
          * * : : . : : : : : : * * ** . . ** : . * ***

>ggHJURP  SSASSGSVALHLVKEGKTRKNDPSSDTSRFCSSSTCSIISDGNFTFPKDYLLASGTLLI  467
>hsHJURP  LKWLIS--PVKIVSRPTIRQG--HGENRQREIEIRFDQLHREYCLSPRNQ---PRRMCL  458
          . . . : : * . . * . . : : . * . . . : : * : : . : :

>ggHJURP  KPEKKISERQNSFQRRHSFSSLSMKQSPSKTPQKHEDAFEKLYYKLCSRGSKPLTLTKP  527
>hsHJURP  PDSWAMNMYRGGPASPGLLQGLETRRLSLPSSKAKAKSLSEAFENLGKRSLEAGRCLPKS  518
          . . . : . . . : . . * : : . : : : : : : : * . * : * . *

>ggHJURP  LSNSQKLEEKGGIMRNTFSDSVGSSIQYNVAFEKIYQQLSSEVVPKIPGFQRASNLRYE  587
>hsHJURP  DSSSS-LPKTNPHTSATRPQQTSDLHVQGNSSGIFRKSVPSPSKTLSVP----DKEVPGHG  573
          * . * . * . . . * : . . . . . : : : * . . . * : : :

>ggHJURP  GIQMSSETVNALVNSPVRSLYAIIPRVKRLGNFQNDLLSSPVKRLKNIPEHFFSTKCCQISH  647
>hsHJURP  RNRYDEIKKEFDKLRHQYCLKSPGQMTVPLCIGVSTDKASMEVRYQTGFLGKLNPDPHF  633
          . * : : : : * : . . . . . : : . : : * * : . . : .

>ggHJURP  KKYDDLQTVGMDFVSLHKGSNTRFFNNHNCHHQDSGFHASSDKTFLVIPDASLKESENTD  707
>hsHJURP  QGFQKLPSSPLGCRKSLLLGSTAIEAPSSSTCVARAITRDGTRDHFPAK-RPRLSEPGSG  692
          : : . * : : . . * : . . * : . . . : * : * . . * . * : . .

>ggHJURP  VCSSWPRTMPHYSSPGSLKRPQKVSRLKLSYTDGKDRNPSNPLDNVLIKTHQGAFMAYRE  767
>hsHJURP  RQG---NSLGA SDGVDNTVRPGDQSSSQPNSEERGENTSYRME-----EKSDFMLEKL  743
          . . : : . . . : : * . . : : . * * : : . . * * :

>ggHJURP  NGIVL 772
>hsHJURP  ETKSV 748
          : :
    
```

C

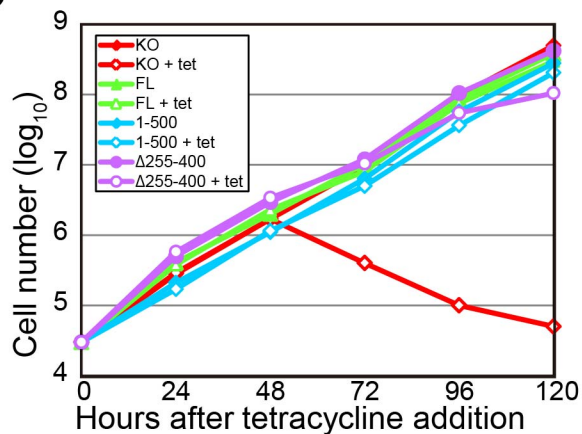

D

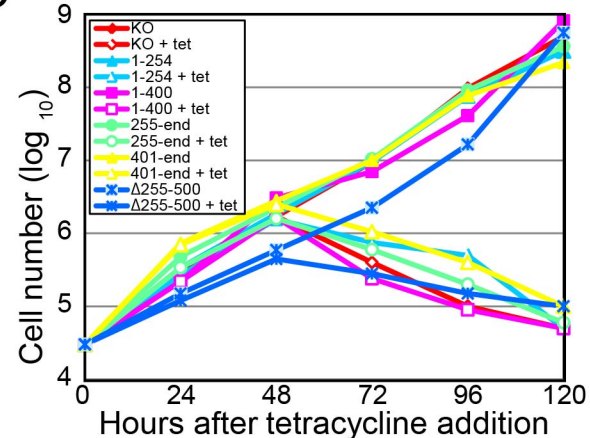

A

| Protein name   | Predicted size (kDa) | Peptide count                |                                      |
|----------------|----------------------|------------------------------|--------------------------------------|
|                |                      | FLAG-IP Mis18 $\alpha$ -flag | GFP-IP gfp-CENP-C <sup>644-864</sup> |
| CENP-C         | 96.2 (864 aa)        | 0                            | 35                                   |
| HJURP          | 87.6 (772 aa)        | 6                            | 6                                    |
| Mis18 $\alpha$ | 22.2 (204 aa)        | 32                           | 0                                    |
| Mis18 $\beta$  | 24.1 (213 aa)        | 46                           | 0                                    |
| Mis18BP1       | 122.2 (1088 aa)      | 133                          | 0                                    |

B

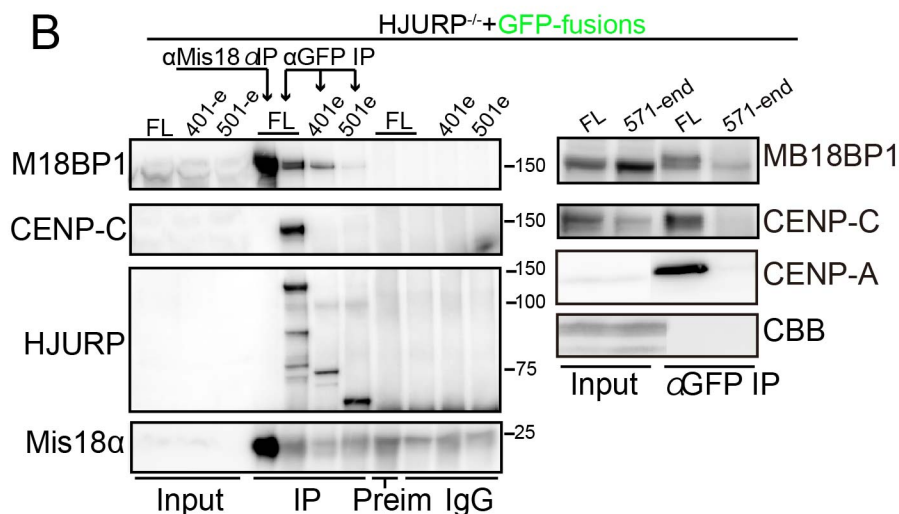

C

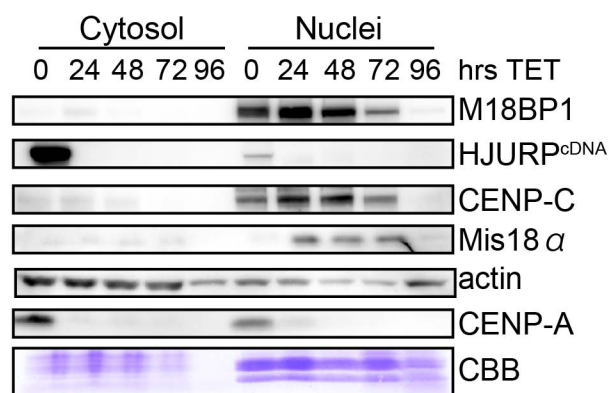

D

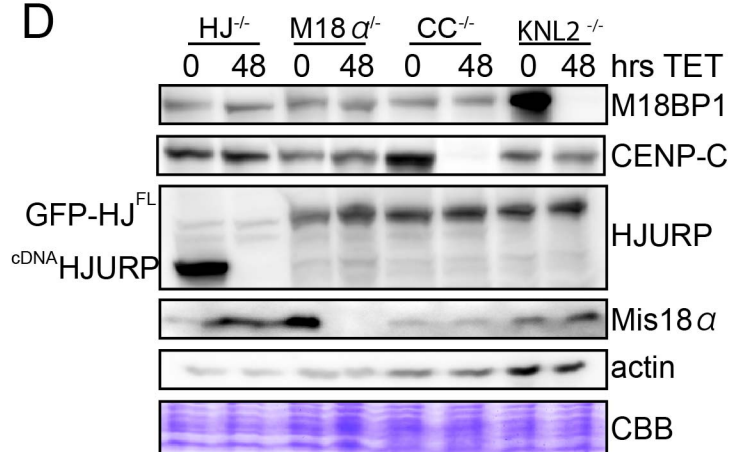

E

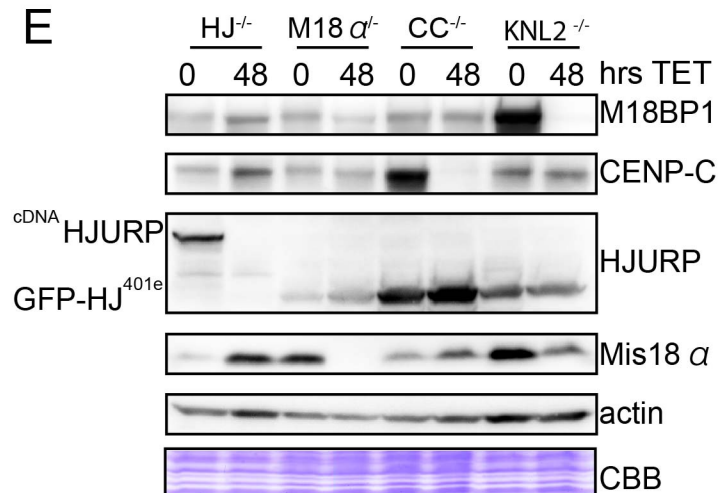

F

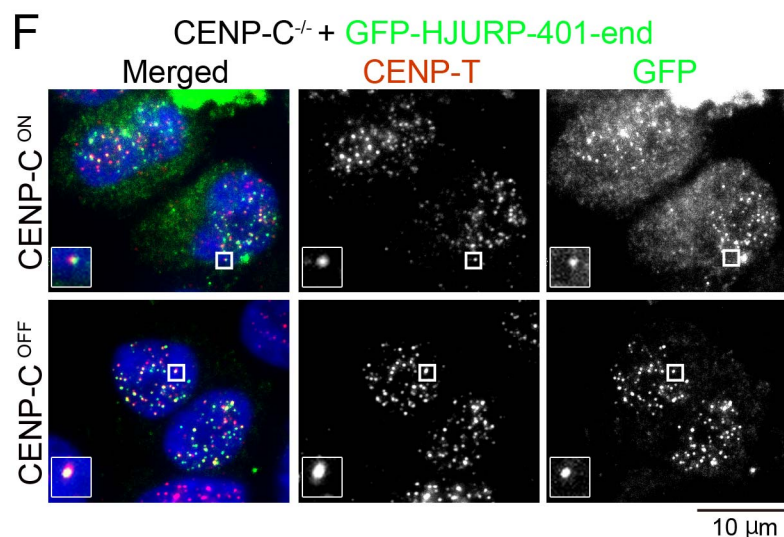

G

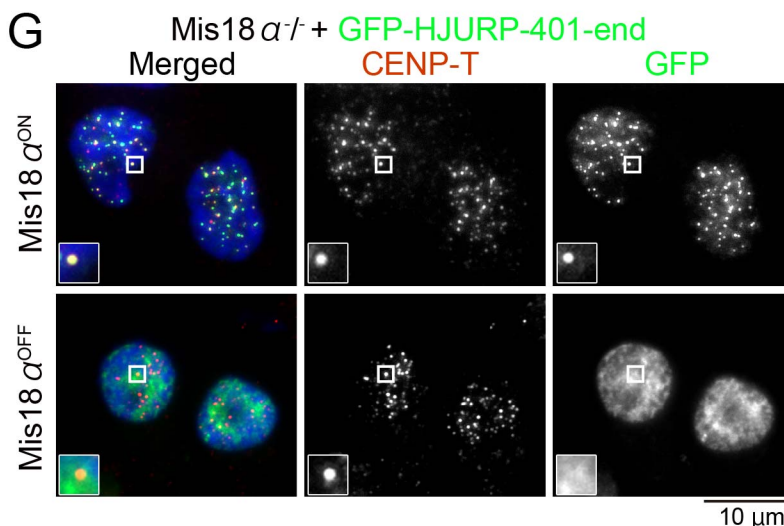

H

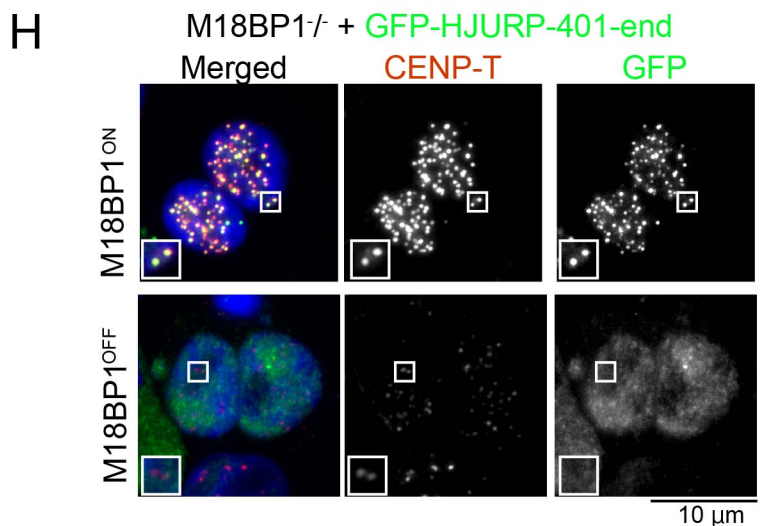

A

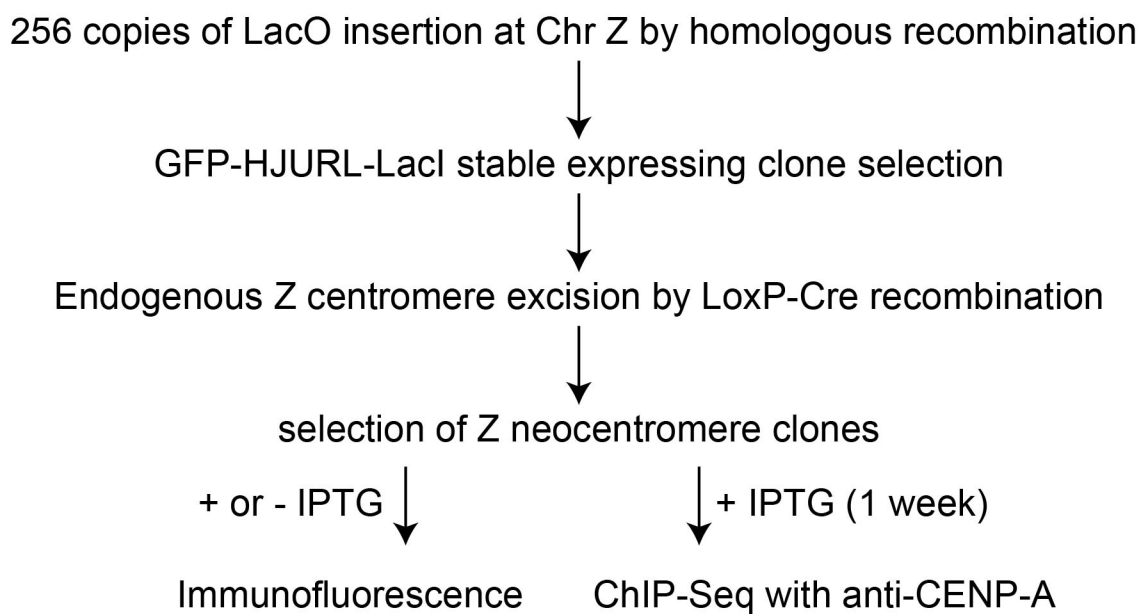

B

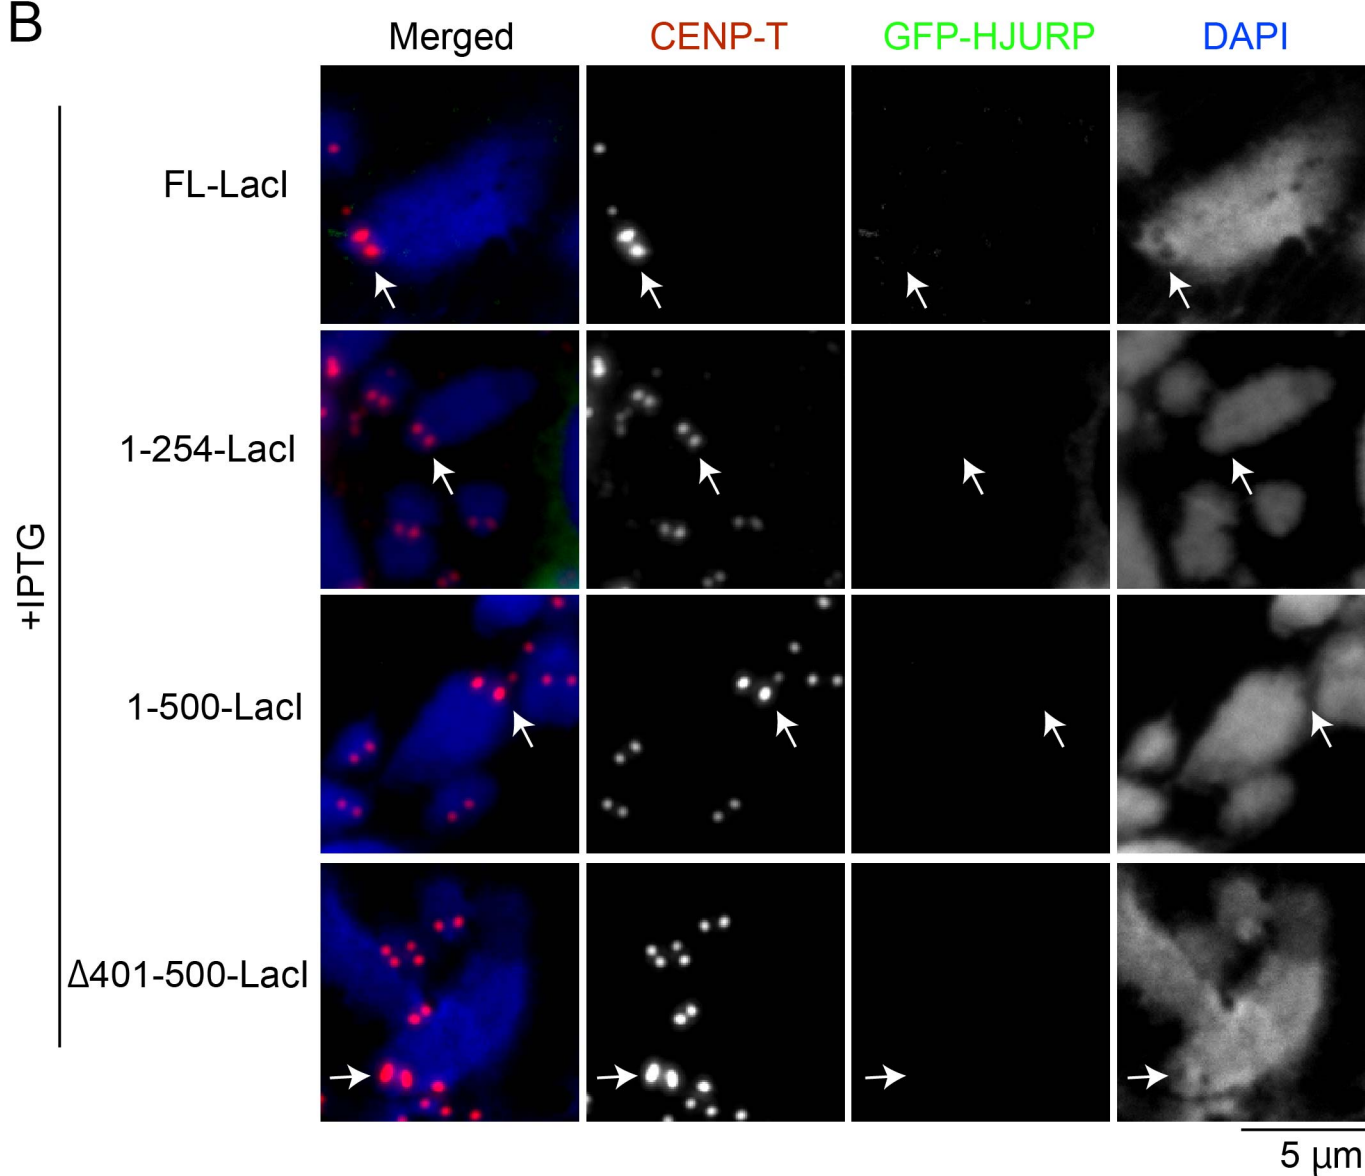

Supplement: supp_E15-02-0094v1_CombinedSupMats.pdf [file supp_E15-02-0094v1_CombinedSupMats.pdf]
